# Supplementary material
Source: PubMed Central journal article supplement (PMC2772774)
Supplement: supp_83_21_10951__1.pdf [file supp_83_21_10951__1.pdf]

Figure S1

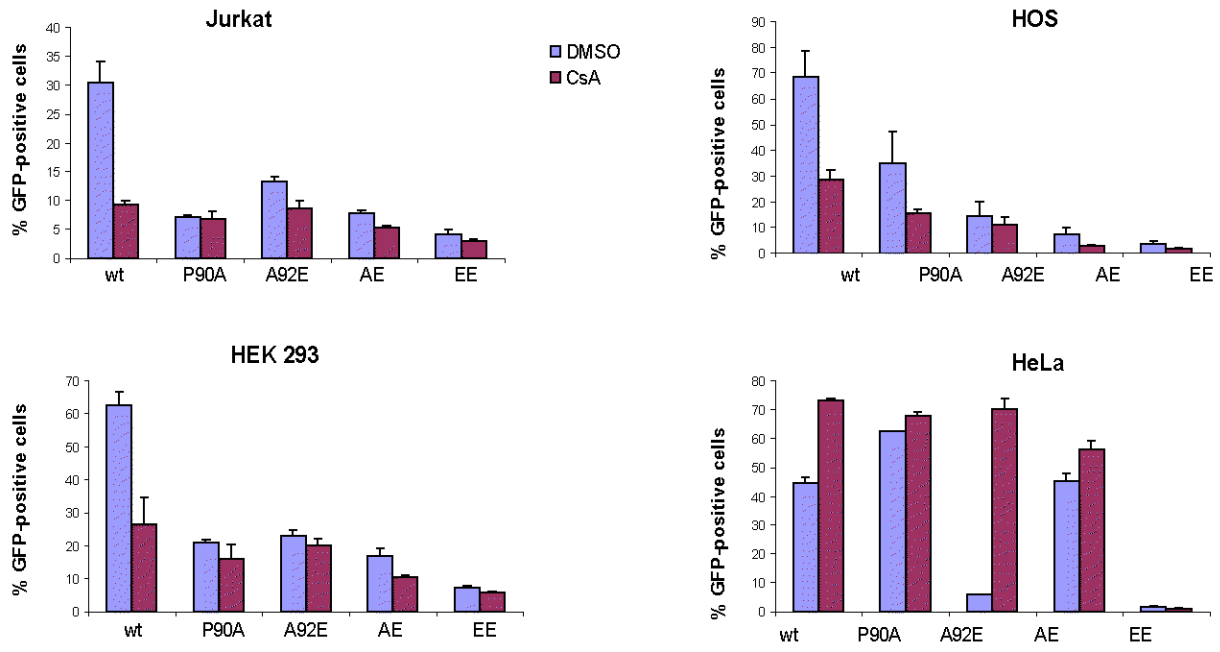

**Figure S1. Infectivity of HIV-1 CA mutants in different target cells.** Different amounts of the wild-type (wt) or mutant HIV-1-GFP were incubated with the indicated target cells ( $10^4$  cells) in the presence of DMSO (blue bars) or 5  $\mu$ M CsA (red bars). After 48 hours, the percentage of GFP-positive cells was determined by FACS. For each target cell type, a non-saturating dose (1.5 – 6.0 ng RT in 100  $\mu$ l final volume) of wild-type HIV-1-GFP was selected and utilized, and the percentage of GFP-positive cells at that dose is shown for all of the mutants. Means and standard deviations from at least two independent experiments are shown.
